# Supplementary material
Source: HighWire-hosted journal article supplement (https://erj.ersjournals.com/content/56/4/2001720)
Supplement: inline-supplementary-material-2 [file inline-supplementary-material-2.pdf]

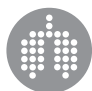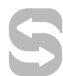

SHAREABLE PDF

# Successful *Pseudomonas aeruginosa* eradication improves outcomes after lung transplantation: a retrospective cohort analysis

Benedicte De Muynck<sup>1,7</sup>, Anke Van Herck<sup>2,7</sup>, Annelore Sacreas<sup>2</sup>, Tobias Heigl<sup>2</sup>, Janne Kaes<sup>2</sup>, Arno Vanstapel<sup>2</sup>, Stijn E. Verleden<sup>2</sup>, Arne P. Neyrinck<sup>3</sup>, Laurens J. Ceulemans<sup>4</sup>, Dirk E. Van Raemdonck<sup>2,4</sup>, Katrien Lagrou<sup>5,6</sup>, Bart M. Vanaudenaerde<sup>2</sup>, Geert M. Verleden<sup>1,2</sup>, Robin Vos <sup>1,2</sup>, and the Leuven Lung Transplant Group

**Affiliations:** <sup>1</sup>Dept of Respiratory Medicine, University Hospitals Leuven, Leuven, Belgium. <sup>2</sup>Dept of Chronic Diseases, Metabolism & Ageing (CHROMETA), Laboratory of Respiratory Diseases and Thoracic Surgery (BREATHE), KU Leuven, Leuven, Belgium. <sup>3</sup>Dept of Cardiovascular Sciences, KU Leuven, Leuven, Belgium. <sup>4</sup>Dept of Thoracic Surgery, University Hospitals Leuven, Leuven, Belgium. <sup>5</sup>Dept of Microbiology, Immunology and Transplantation, KU Leuven, Leuven, Belgium. <sup>6</sup>Dept of Laboratory Medicine and National Reference Center for Mycosis, University Hospitals Leuven, Leuven, Belgium. <sup>7</sup>Contributed equally.

**Correspondence:** Robin Vos, Dept of CHROMETA, Lab of BREATHE, KU Leuven, Herestraat 49, B-3000 Leuven, Belgium. E-mail: robin.vos@uzleuven.be

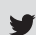

@ERSpublications

**Presence of *P. aeruginosa* in respiratory samples after lung transplantation is associated with worse outcomes. Successful eradication improves outcomes and pulmonary function. Therefore, early treatment of *P. aeruginosa* should be pursued.** <https://bit.ly/2XuDPG2>

**Cite this article as:** De Muynck B, Van Herck A, Sacreas A, *et al.* Successful *Pseudomonas aeruginosa* eradication improves outcomes after lung transplantation: a retrospective cohort analysis. *Eur Respir J* 2020; 56: 2001720 [https://doi.org/10.1183/13993003.01720-2020].

This single-page version can be shared freely online.

**ABSTRACT** Long-term survival after lung transplantation (LTx) is hampered by development of chronic lung allograft dysfunction (CLAD). *Pseudomonas aeruginosa* is an established risk factor for CLAD. Therefore, we investigated the effect of *P. aeruginosa* eradication on CLAD-free and graft survival.

Patients who underwent first LTx between July, 1991, and February, 2016, and were free from CLAD, were retrospectively classified according to *P. aeruginosa* presence in respiratory samples between September, 2011, and September, 2016. *P. aeruginosa*-positive patients were subsequently stratified according to success of *P. aeruginosa* eradication following targeted antibiotic treatment. CLAD-free and graft survival were compared between *P. aeruginosa*-positive and *P. aeruginosa*-negative patients; and between patients with or without successful *P. aeruginosa* eradication. In addition, pulmonary function was assessed during the first year following *P. aeruginosa* isolation in both groups.

CLAD-free survival of *P. aeruginosa*-negative patients (n=443) was longer compared with *P. aeruginosa*-positive patients (n=95) (p=0.045). Graft survival of *P. aeruginosa*-negative patients (n=443, 82%) was better compared with *P. aeruginosa*-positive patients (n=95, 18%) (p<0.0001). Similarly, *P. aeruginosa*-eradicated patients demonstrated longer CLAD-free and graft survival compared with patients with persistent *P. aeruginosa*. Pulmonary function was higher in successfully *P. aeruginosa*-eradicated patients compared with unsuccessfully eradicated patients (p=0.035).

*P. aeruginosa* eradication after LTx improves CLAD-free and graft survival and maintains pulmonary function. Therefore, early *P. aeruginosa* detection and eradication should be pursued.
